# Supplementary material
Source: PubMed Central journal article supplement (PMC7179316)
Supplement: AAC.02291-19-s0001.pdf [file AAC.02291-19-s0001.pdf]

Supplementary Appendix 1

*Pseudomonas aeruginosa* antibiogram

| Percent susceptible <sup>a</sup>                                                                |                            |          |            |             |                             |           |               |          |
|-------------------------------------------------------------------------------------------------|----------------------------|----------|------------|-------------|-----------------------------|-----------|---------------|----------|
| Ceftazidime-<br>avibactam                                                                       | Ceftolozane-<br>tazobactam | Amikacin | Tobramycin | Ceftazidime | Piperacillin-<br>tazobactam | Meropenem | Ciprofloxacin | Colistin |
| 73.8                                                                                            | 88.7                       | 91.6     | 77.0       | 29.0        | 17.7                        | 11.0      | 16.2          | 77.8     |
| N=61                                                                                            | N=168                      | N=226    | N=222      | N=169       | N=215                       | N=218     | N=148         | N=63     |
| a. Clinical and Laboratory Standards Institute (CLSI) 2019 breakpoints used for all antibiotics |                            |          |            |             |                             |           |               |          |

Supplementary Appendix 2

Univariate analyses for clinical failure in patient with MDR *Pseudomonas aeruginosa* infection

|                                                         | <b>Clinical success<sup>a</sup></b> | <b>Clinical failure<sup>a</sup></b> | <b>Odds ratio (95% CI)</b> | <b>P value</b> |
|---------------------------------------------------------|-------------------------------------|-------------------------------------|----------------------------|----------------|
| Age, years                                              |                                     |                                     | 1.023 (1.004, 1.041)       | 0.017          |
| Age ≥ 65 years                                          | 51 (36.2)                           | 41 (48.2)                           | 1.644 (0.952, 2.841)       | 0.074          |
| Male gender                                             | 92 (65.2)                           | 50 (58.8)                           | 0.761 (0.437, 1.324)       | 0.333          |
| African American                                        | 38 (46.3)                           | 34 (50.7)                           | 1.193 (0.625, 2.277)       | 0.592          |
| BMI                                                     |                                     |                                     | 1.006 (0.973, 1.040)       | 0.730          |
| Obese (BMI ≥ 30 kg/m <sup>2</sup> )                     | 45 (31.9)                           | 28 (32.9)                           | 1.059 (0.585, 1.917)       | 0.850          |
| Normal/overweight (BMI<br>18.5 – 29 kg/m <sup>2</sup> ) | 80 (56.7)                           | 47 (55.3)                           | Reference                  | ---            |
| Underweight (BMI < 18.5<br>kg/m <sup>2</sup> )          | 16 (11.3)                           | 10 (11.8)                           | 1.064 (0.446, 2.535)       | 0.889          |
| CrCl (ml/min)                                           |                                     |                                     | 0.993 (0.989, 0.998)       | 0.006          |
| CrCl (mL/min) groups <sup>a</sup>                       |                                     |                                     |                            |                |

|                                    |            |           |                       |        |
|------------------------------------|------------|-----------|-----------------------|--------|
| Hemodialysis                       | 7 (5.0)    | 11 (12.9) | 3.307 (1.207, 9.060)  | 0.020  |
| CrCl < 15 mL/min                   | 2 (1.4)    | 2 (2.4)   | 2.104 (0.288, 15.391) | 0.464  |
| CrCl 15 - 29 mL/min                | 9 (6.4)    | 11 (12.9) | 2.572 (0.999, 6.620)  | 0.050  |
| CrCl 30 - 50 mL/min                | 22 (15.6)  | 13 (15.3) | 1.242 (0.577, 2.677)  | 0.5778 |
| CrCl > 50 mL/min                   | 101 (71.6) | 48 (56.5) | Reference             | ---    |
| CrCl < 30mL/min or<br>Hemodialysis | 18 (12.8)  | 24 (28.2) | 2.689 (1.357, 5.327)  | 0.004  |
| Community admission source         | 63 (44.7)  | 41 (48.2) | 1.154 (0.673, 1.979)  | 0.604  |
| <b>Comorbid conditions</b>         |            |           |                       |        |
| Diabetes                           | 59 (41.8)  | 38 (44.7) | 1.124 (0.653, 1.934)  | 0.674  |
| Heart Failure                      | 25 (17.7)  | 21 (24.1) | 1.523 (0.790, 2.933)  | 0.207  |
| COPD                               | 25 (17.7)  | 26 (30.6) | 2.045 (1.087, 3.848)  | 0.025  |
| Malignancy                         | 12 (8.5)   | 10 (11.8) | 1.433 (0.591, 3.477)  | 0.424  |
| Liver disease                      | 8 (5.7)    | 7 (8.2)   | 1.492 (0.521, 4.273)  | 0.454  |
| Charlson Comorbidity score         |            |           | 1.084 (0.979, 1.201)  | 0.121  |

|                                                    |            |           |                      |         |
|----------------------------------------------------|------------|-----------|----------------------|---------|
| Charlson Comorbidity score > 4                     | 47 (33.3)  | 35 (41.2) | 1.400 (0.803, 2.441) | 0.235   |
| Immunocompromised                                  | 12 (8.5)   | 6 (7.1)   | 0.816 (0.295, 2.62)  | 0.696   |
| MDRO infection or colonization within 1 year       | 85 (60.3)  | 44 (51.8) | 0.707 (0.411, 1.217) | 0.210   |
| Recent antibiotic exposure (≥ 24 h within 90 days) | 108 (76.6) | 65 (76.5) | 0.993 (0.526, 1.874) | 0.983   |
| Recent hospitalization (≥ 48 hours within 90 days) | 96 (68.1)  | 60 (70.6) | 1.125 (0.626, 2.021) | 0.693   |
| Recent surgery (within 30 days)                    | 17 (12.1)  | 14 (16.5) | 1.438 (0.669, 3.091) | 0.350   |
| ICU at index culture                               | 62 (44.0)  | 55 (64.7) | 2.336 (1.340, 4.071) | 0.003   |
| SOFA score                                         |            |           | 1.217 (1.120, 1.323) | < 0.001 |
| APACHE II score                                    |            |           | 1.069 (1.034, 1.105) | < 0.001 |
| Hospital-acquired infection                        | 79 (56.0)  | 63 (74.1) | 2.247 (1.248, 4.048) | 0.006   |
| Infection Source                                   |            |           |                      |         |

|                                 |           |           |                       |       |
|---------------------------------|-----------|-----------|-----------------------|-------|
| Primary bacteremia              | 3 (2.1)   | 1 (1.2)   |                       |       |
| Respiratory                     | 82 (58.2) | 67 (78.8) |                       |       |
| Ventilator-associated pneumonia | 46 (32.6) | 43 (50.3) |                       |       |
| Intra-abdominal                 | 7 (5.0)   | 4 (4.7)   |                       |       |
| Skin and soft tissue            | 18 (12.4) | 8 (9.4)   |                       |       |
| Osteoarticular                  | 9 (6.4)   | 1 (1.2)   |                       |       |
| Urine                           | 19 (13.5) | 2 (2.4)   |                       |       |
| Prosthetic device               | 1 (0.7)   | 0         |                       |       |
| Intravenous catheter            | 1 (0.7)   | 1 (1.2)   |                       |       |
| Other                           | 1 (0.7)   | 0         |                       |       |
| Respiratory source              |           |           | 2.043 (1.052, 3.966)  | 0.035 |
| Non-respiratory, non-urinary    |           |           | Reference             | ---   |
| Urinary source                  |           |           | 0.263 (0.055, 1.263)  | 0.095 |
| Positive blood cultures         | 5 (3.5)   | 3 (3.5)   | 0.995 (0.232, 4.274)  | 1.00  |
| Secondary bacteremia            | 2 (1.4)   | 2 (2.4)   | 1.675 (0.232, 12.111) | 0.633 |

|                                                                             |              |              |                      |       |
|-----------------------------------------------------------------------------|--------------|--------------|----------------------|-------|
| Monomicrobial infection                                                     | 84 (59.6)    | 60 (70.6)    | 1.629 (0.916, 2.895) | 0.095 |
| Enterobacterales co-infection                                               | 30 (21.3)    | 18 (21.2)    | 0.994 (0.515, 1.920) | 0.986 |
| <b>Treatment information</b>                                                |              |              |                      |       |
| Infectious disease consult                                                  | 141 (100)    | 85(100)      | ---                  | ---   |
| Surgical consult                                                            | 33 (23.4)    | 18 (21.2)    | 0.879 (0.459, 1.685) | 0.698 |
| Source control in patients<br>with infection amendable to<br>source control | 35/45 (77.8) | 12/18 (66.7) | 0.571 (0.171, 1.908) | 0.360 |
| Active antibiotic(s) before<br>C/T                                          | 49 (34.8)    | 23 (27.1)    | 0.697 (0.386, 1.258) | 0.229 |
| Time to active antibiotic(s)<br>(hours)                                     |              |              | 1.002 (0.999, 1.004) | 0.236 |
| Active antibiotic therapy ≤ 48<br>hours after culture collection            | 70 (49.6)    | 34 (40.0)    | 0.676 (0.392, 1.166) | 0.159 |
| Time to C/T (hours)                                                         |              |              | 1.002 (0.999, 1.004) | 0.294 |
| C/T within 48 hour                                                          | 32 (22.7)    | 19 (22.4)    | 0.981 (0.515, 1.868) | 0.952 |

|                                                                    |                |                |                      |       |
|--------------------------------------------------------------------|----------------|----------------|----------------------|-------|
| C/T within 72 hours                                                | 54 (38.3)      | 37 (43.5)      | 1.242 (0.719, 2.146) | 0.437 |
| C/T within 96 hours                                                | 85 (60.3)      | 53 (62.4)      | 1.091 (0.627, 1.898) | 0.757 |
| C/T within 120 hours                                               | 103 (73.0)     | 58 (68.2)      | 0.793 (0.440, 1.428) | 0.439 |
| Combination IV antibiotic therapy with C/T                         | 37 (26.2)      | 21 (24.7)      | 0.922 (0.496, 1.714) | 0.798 |
| Combination therapy in patients with a respiratory tract infection | 19/82 (23.2)   | 19/67 (28.4)   | 1.313 (0.627, 2.747) | 0.470 |
| Inhaled antibiotic therapy                                         | 22 (15.6)      | 22 (25.9)      | 1.889 (0.971, 3.671) | 0.059 |
| Inhaled antibiotics in patients with a respiratory tract infection | 22 / 82 (26.8) | 22 / 67 (32.8) | 1.333 (0.658, 2.702) | 0.424 |
| High dose C/T                                                      | 85 (60.3)      | 58 (68.2)      | 1.415 (0.802, 2.497) | 0.230 |
| High dose C/T in patients with a respiratory tract infection       | 57/82 (69.5)   | 48/67 (71.6)   | 1.108 (0.545, 2.252) | 0.777 |

|                                                                                                                                                                                                                                                                                                                                                                                                                                          |           |           |                      |       |
|------------------------------------------------------------------------------------------------------------------------------------------------------------------------------------------------------------------------------------------------------------------------------------------------------------------------------------------------------------------------------------------------------------------------------------------|-----------|-----------|----------------------|-------|
|                                                                                                                                                                                                                                                                                                                                                                                                                                          |           |           |                      |       |
| C/T renal adjustment                                                                                                                                                                                                                                                                                                                                                                                                                     | 35 (24.8) | 34 (40.0) | 2.019 (1.133, 3.600) | 0.016 |
| C/T renal adjustment in patients with a respiratory tract infection                                                                                                                                                                                                                                                                                                                                                                      | 15 (18.3) | 29 (43.3) | 3.409 (1.627, 7.142) | 0.001 |
| <p>a. All values represent number (%) or median (interquartile range)</p> <p>APACHE: Acute Physiology and Chronic Health Evaluation; BMI: body mass index; CI: confidence interval; CRE: carbapenem-resistant Enterobacterales; CrCl: creatinine clearance; CZA: ceftazidime-avibactam; ICU: intensive care unit; LTAC: long-term acute care hospital; MDRO: multidrug-resistant organism; SOFA: Sequential Organ Failure Assessment</p> |           |           |                      |       |



Supplementary Appendix 3

Univariate analyses for clinical failure in patient with C/T susceptible MDR *Pseudomonas aeruginosa* infection

|                                     | <b>Clinical success<sup>a</sup></b><br><b>N = 87</b> | <b>Clinical failure<sup>a</sup></b><br><b>N = 61</b> | <b>Odds ratio (95% CI)</b> | <b>P value</b> |
|-------------------------------------|------------------------------------------------------|------------------------------------------------------|----------------------------|----------------|
| Age, years                          |                                                      |                                                      | 1.033 (1.009, 1.057)       | 0.006          |
| Age ≥ 65 years                      | 28 (32.2)                                            | 32 (52.5)                                            | 2.325 (1.185, 4.564)       | 0.013          |
| Male gender                         | 56 (64.4)                                            | 36 (59.0)                                            | 0.79 (0.402, 1.562)        | 0.509          |
| African American                    | 47 (54.0)                                            | 27 (44.3)                                            | 0.676 (0.350, 1.305)       | 0.242          |
| BMI                                 |                                                      |                                                      | 1.006 (0.963, 1.050)       | 0.798          |
| Obese (BMI ≥ 30 kg/m <sup>2</sup> ) | 27 (31.0)                                            | 20 (32.8)                                            | 1.048 (0.538, 2.186)       | 0.822          |
| CrCl (ml/min)                       |                                                      |                                                      | 0.994 (0.989, 0.999)       | 0.021          |
| CrCl (mL/min) groups <sup>a</sup>   |                                                      |                                                      |                            |                |
| Hemodialysis                        | 5 (5.7)                                              | 6 (9.8)                                              | 1.946 (0.554, 6.830)       | 0.299          |
| CrCl < 30 mL/min                    | 5 (5.7)                                              | 10 (16.4)                                            | 3.243 (1.028, 10.233)      | 0.045          |
| CrCl 30 - 50 mL/min                 | 17 (19.5)                                            | 8 (13.1)                                             | 0.763 (0.300, 1.944)       | 0.571          |

|                                                 |           |           |                      |       |
|-------------------------------------------------|-----------|-----------|----------------------|-------|
| CrCl > 50 mL/min                                | 60 (69.0) | 37 (60.7) | Reference            |       |
| CrCl < 30mL/min or<br>Hemodialysis              | 10 (11.5) | 16 (26.2) | 2.738 (1.145, 6.545) | 0.02  |
| Community admission source                      | 34 (39.1) | 30 (49.2) | 1.509 (0.779, 2.923) | 0.222 |
| <b>Comorbid conditions</b>                      |           |           |                      |       |
| Diabetes                                        | 36 (41.4) | 27 (44.3) | 1.125 (0.581, 2.179) | 0.727 |
| Heart Failure                                   | 17 (19.5) | 15 (24.6) | 1.343 (0.611, 2.952) | 0.463 |
| COPD                                            | 17 (19.5) | 22 (36.1) | 2.323 (1.103, 4.889) | 0.025 |
| Malignancy                                      | 6 (6.9)   | 7 (11.5)  | 1.750 (0.558, 5.491) | 0.333 |
| Liver disease                                   | 6 (6.9)   | 6 (9.8)   | 1.473 (0.452, 4.804) | 0.519 |
| Charlson Comorbidity score                      |           |           | 1.056 (0.933, 1.195) | 0.389 |
| Charlson Comorbidity score ><br>4               | 32 (36.8) | 24 (39.3) | 1.115 (0.568, 2.187) | 0.752 |
| Immunocompromised                               | 5 (5.7)   | 5 (8.2)   | 1.464 (0.405, 5.295) | 0.559 |
| MDRO infection or<br>colonization within 1 year | 53 (60.9) | 30 (49.2) | 0.621 (0.320, 1.203) | 0.157 |

|                                                       |           |           |                      |         |
|-------------------------------------------------------|-----------|-----------|----------------------|---------|
| Recent antibiotic exposure<br>(≥ 24 h within 90 days) | 71 (81.6) | 49 (80.3) | 0.920 (0.400, 2.115) | 0.845   |
| Recent hospitalization (≥ 48<br>hours within 90 days) | 65 (74.7) | 46 (75.4) | 1.038 (0.487, 2.213) | 0.923   |
| Recent surgery (within 30<br>days)                    | 8 (9.2)   | 9 (14.8)  | 1.709 (0.620, 4.714) | 0.297   |
| ICU at index culture                                  | 42 (48.3) | 44 (72.1) | 2.773 (1.377, 5.585) | 0.004   |
| SOFA score                                            |           |           | 1.221 (1.100, 1.354) | < 0.001 |
| APACHE II score                                       |           |           | 1.077 (1.032, 1.124) | 0.001   |
| Hospital-acquired infection                           | 48 (55.2) | 44 (72.1) | 2.103 (1.043, 4.240) | 0.036   |
| Infection Source                                      |           |           |                      |         |
| Primary bacteremia                                    | 2 (2.3)   | 1 (1.6)   |                      |         |
| Respiratory                                           | 54 (62.1) | 48 (78.7) |                      |         |
| Ventilator-associated<br>pneumonia                    | 33 (37.9) | 29 (47.5) |                      |         |
| Intra-abdominal                                       | 4 (4.6)   | 3 (4.9)   |                      |         |

|                              |              |             |                       |       |
|------------------------------|--------------|-------------|-----------------------|-------|
| Skin and soft tissue         | 8 (9.2)      | 6 (9.8)     |                       |       |
| Osteoarticular               | 4 (4.6)      | 0           |                       |       |
| Urine                        | 12 (13.8)    | 2 (3.3)     |                       |       |
| Prosthetic device            | 1(1.1)       | 0           |                       |       |
| Intravenous catheter         | 1 (1.1)      | 1 (1.6)     |                       |       |
| Other                        |              |             |                       |       |
| Respiratory source           |              |             | 1.697 (0.742, 3.879)  | 0.210 |
| Non-respiratory, non-urinary |              |             | Reference             | ---   |
| Urinary source               |              |             | 0.318 (0.060, 1.682)  | 0.178 |
| Positive blood cultures      | 2 (2.3)      | 2 (3.3)     | 1.441 (0.197, 10.517) | 1.00  |
| Secondary bacteremia         | 0            | 1 (1.6)     | ---                   | ---   |
| Polymicrobial infection      | 35 (40.2)    | 19 (31.1)   | 0.672 (0.337, 1.341)  | 0.259 |
| <b>Treatment information</b> |              |             |                       |       |
| Infectious disease consult   | 87 (100)     | 61 (100)    | ---                   | ---   |
| Surgical consult             | 18 (20.7)    | 11 (18.0)   | 0.843 (0.366, 1.941)  | 0.689 |
| Source control in patients   | 17/23 (73.9) | 8/12 (66.7) | 0.706 (0.155, 3.224)  | 0.652 |

|                                                               |              |              |                      |       |
|---------------------------------------------------------------|--------------|--------------|----------------------|-------|
| with infection amendable to source control                    |              |              |                      |       |
| Active antibiotic(s) before C/T                               | 29 (33.3)    | 17 (27.9)    | 0.773 (0.378, 1.580) | 0.480 |
| Time to active antibiotic(s) (hours)                          |              |              | 1.001 (0.998, 1.004) | 0.488 |
| Active antibiotic therapy ≤ 48 hours after culture collection | 35 (40.2)    | 24 (39.3)    | 0.964 (0.494, 1.881) | 0.914 |
| Time to C/T (hours)                                           |              |              | 1.002 (0.998, 1.006) | 0.335 |
| C/T within 48 hours                                           | 16 (18.4)    | 13 (21.3)    | 1.202 (0.530, 2.724) | 0.659 |
| C/T within 72 hours                                           | 28 (32.2)    | 26 (42.6)    | 1.565 (0.795, 3.084) | 0.194 |
| C/T within 96 hours                                           | 51 (58.6)    | 38 (62.3)    | 1.166 (0.596, 2.281) | 0.653 |
| C/T within 120 hours                                          | 67 (77.0)    | 42 (68.9)    | 0.660, 0.316, 1.379) | 0.267 |
| Combination IV antibiotic therapy with C/T                    | 22 (25.3)    | 14 (23.0)    | 0.880 (0.408, 1.897) | 0.744 |
| Combination IV therapy in                                     | 12/54 (22.2) | 12/48 (25.0) | 1.167 (0.467, 2.915) | 0.741 |

|                                                                     |               |              |                      |       |
|---------------------------------------------------------------------|---------------|--------------|----------------------|-------|
| patients with a respiratory tract infection                         |               |              |                      |       |
| Inhaled antibiotics in patients with a respiratory tract infection  | 14 /54 (25.9) | 15/48 (31.3) | 1.299 (0.548, 3.075) | 0.552 |
| High dose C/T                                                       | 53 (60.9)     | 44 (72.1)    | 1.660 (0.819, 3.364) | 0.158 |
| High dose C/T in patients with a respiratory tract infection        | 38 (70.4)     | 35 (72.9)    | 1.134 (0.478, 2.690) | 0.776 |
| C/T renal adjustment                                                | 22 (25.3)     | 23 (37.7)    | 1.788 (0.881, 3.632) | 0.106 |
| C/T renal adjustment in patients with a respiratory tract infection | 11 (20.4)     | 20 (41.7)    | 2.792 (1.163, 6.707) | 0.020 |

b. All values represent number (%) or median (interquartile range)

APACHE: Acute Physiology and Chronic Health Evaluation; BMI: body mass index; CI: confidence interval; CRE: carbapenem-resistant Enterobacterales; CrCl: creatinine clearance; CZA: ceftazidime-avibactam; ICU: intensive care unit; LTAC: long-term

acute care hospital; MDRO: multidrug-resistant organism; SOFA: Sequential Organ Failure Assessment
